# Supplementary material for: Retroviral Replicating Vectors Mediated Prodrug Activator Gene Therapy in a Gastric Cancer Model
Source: MDPI journal article supplement (doi:10.3390/ijms241914823), 2023-10-02
Supplement: s1 [file s1]

**Table S1: Human gastric cancer cell lines used in this study**

| name     | ID number | Type                                            | Tissue site of collection |
|----------|-----------|-------------------------------------------------|---------------------------|
| HGC-27   | RCB0500   | Undifferentiated carcinoma                      | Metastatic lymph node     |
| KATO-III | RCB2088   | Signet ring carcinoma                           | Stomach                   |
| MKN-7    | RCB3687   | Highly differentiated tubular<br>adenocarcinoma | Stomach                   |
| MKN-45   | RCB1001   | Poorly differentiated gastric<br>adenocarcinoma | Stomach, Liver metastasis |
| MKN-74   | RCB1002   | Moderately differentiated adenocarcinoma        | Stomach, Liver metastasis |

**Table S2: Abbreviation list**

|           |                                             |
|-----------|---------------------------------------------|
| 5-FC      | 5-fluorocytosine                            |
| 5-FU      | 5-fluorourasil                              |
| AMLV      | amphotropic murine leukemia virus           |
| CD        | yeast cytosine deaminase                    |
| DMEM      | Dulbecco's modified Eagle's medium          |
| FACS      | fluorescence-activated cell sorter          |
| FBS       | fetal bovine serum                          |
| GALV      | gibbon ape leukemia virus                   |
| GAPDH     | glyceraldehyde-3-phosphate dehydrogenase    |
| GC        | gastric cancer                              |
| GFP       | Green Fluorescent Protein                   |
| HSV-tk    | herpes simplex virus thymidine kinase       |
| IRES      | internal ribosome entry site                |
| MOI       | multiplicity of infection                   |
| PBS       | phosphate-buffered saline                   |
| PiT       | inorganic phosphate transporter             |
| qPCR      | quantitative polymerase chain reaction      |
| RPMI 1640 | Roswell Park Memorial Institute 1640 medium |
| RRV       | retroviral replicating vectors              |
| RT-PCR    | real-time polymerase chain reaction         |
| SD        | standard deviation                          |
| SE        | standard error                              |
| TU        | transduction units                          |
